# Supplementary material
Source: PubMed Central journal article supplement (PMC7301889)
Supplement: NIHMS1547014-supplement-10822_2019_271_MOESM1_ESM.pdf [file NIHMS1547014-supplement-10822_2019_271_MOESM1_ESM.pdf]

## Supplementary Information

**Table S1. Procurement details of SAMPL6 Part II Octanol-Water Partition Coefficient Challenge compounds.** <sup>1</sup> Purities for these compounds were determined by LC-MS methods and reported elsewhere [29].

| <b>SAMPL6 Part II Molecule ID</b> | <b>Supplier</b> | <b>Lot no</b> | <b>Cat no</b> | <b>Supplier Reported Purity</b> | <b>Purity Detected by LC-MS</b> | <b>CAS no</b> | <b>eMolecules ID</b> |
|-----------------------------------|-----------------|---------------|---------------|---------------------------------|---------------------------------|---------------|----------------------|
| SM02                              | ChemDiv         | CM02432403    | 3232-0333     |                                 | 97.62%                          |               | 1327907              |
| SM04                              | ChemDiv         |               | Z126957826    |                                 | 99.88%                          |               | 30719859             |
| SM07                              | Enamine         | 2017-0168841  | Z57161635     | 95%                             | 99.38%                          | 100818-54-0   | 1327878              |
| SM08                              | Enamine         | 2017-0168838  | Z57157353     | 95%                             | 99.24%                          | 65418_08_8    | 1367649              |
| SM09                              | Enamine         | 2017_0168839  | Z220564816    | 95%                             | 98.97%                          |               | 1865544              |
| SM11                              | Maybridge       | 142989        | RJC00689SC    | 90%                             | 98.02%                          | 5334-30-5     | 719540               |
| SM12                              | Maybridge       | 265423        | DP00818SC     |                                 | 98.13%                          |               | 1859493              |
| SM13                              | Maybridge       | 248841        | GK03474SC     |                                 | 97.51%                          |               | 5828805              |
| SM14                              | Enamine         |               | Z57290870     |                                 | 96.48%                          |               | 31653344             |
| SM15                              | Enamine         |               | Z1318268952   |                                 | 98.70%                          |               | 37095168             |
| SM16                              | VitaScreen      |               | STK098832     |                                 | 97.73%                          |               | 1284691              |

**Table S2. Replicate potentiometric log *P* measurements performed with Sirius T3 for octanol and ISA water biphasic system.** Three or four independent replicate experiments were performed starting from powder samples. Measurements were performed at 25.0 ± 0.5°C and in the presence of approximately 150 mM KCl to adjust ionic strength. A partitioning and ionization equilibrium model was fit to potentiometric measurements to estimate log *P* values of the neutral species and also the charged species. Experiments were optimized to be able to determine log *P* of neutral species with good precision. log *P* estimates of charged species have high variance between replicates and is unreliable.

| SAMPL6 Molecule ID | Experimental Molecule ID | log <i>P</i> , +1 charged | log <i>P</i> , neutral | log <i>P</i> , -1 charged | Experiment code | Target sample weight (mg) | Experiment ID | Experimental Report Filename in Supplementary Info        |
|--------------------|--------------------------|---------------------------|------------------------|---------------------------|-----------------|---------------------------|---------------|-----------------------------------------------------------|
| SM02               | M02                      | 1.32 +- 0.06              | 4.10 +- 0.03           |                           | EXP28-11        | 2 mg                      | 18C-01011     | SM02_18C-01011_M02_octanol_pH-metric_high_logP_report.pdf |
| SM02               | M02                      | 0.45 +- 0.04              | 4.08 +- 0.01           |                           | EXP29-11        | 2 mg                      | 18C-03011     | SM02_18C-03011_M02_octanol_pH-metric_high_logP_report.pdf |
| SM02               | M02                      | 0.59 +- 0.04              | 4.03 +- 0.01           |                           | EXP29-12        | 2 mg                      | 18C-03012     | SM02_18C-03012_M02_octanol_pH-metric_high_logP_report.pdf |
| SM02               | M02                      | 1.14 +- 0.04              | 4.16 +- 0.01           |                           | EXP30-15        | 2 mg                      | 18C-06015     | SM02_18C-06015_M02_octanol_pH-metric_high_logP_report.pdf |
| SM04               | M04                      | 0.82 +- 0.06              | 4.04 +- 0.02           |                           | EXP33-02        | 1.36 mg                   | 18C-24002     | SM04_18C-24002_M04_octanol_pH-metric_high_logP_report.pdf |
| SM04               | M04                      | 0.87 +- 0.03              | 3.95 +- 0.01           |                           | EXP33-03        | 1.36 mg                   | 18C-24003     | SM04_18C-24003_M04_octanol_pH-metric_high_logP_report.pdf |
| SM04               | M04                      | 0.77 +- 0.03              | 3.95 +- 0.02           |                           | EXP33-04        | 1.36 mg                   | 18C-24004     | SM04_18C-24004_M04_octanol_pH-metric_high_logP_report.pdf |
| SM07               | M07                      | 0.44 +- 0.03              | 3.29 +- 0.01           |                           | EXP28-11        | 1 mg                      | 18B-28011     | SM07_18B-28011_M07_octanol_pH-metric_high_logP_report.pdf |
| SM07               | M07                      | -5.97 +- 0.89             | 3.14 +- 0.01           |                           | Exp28-012       | 1 mg                      | 18B-28012     | SM07_18B-28012_M07_octanol_pH-metric_high_logP_report.pdf |
| SM07               | M07                      | 0.31 +- 0.04              | 3.21 +- 0.01           |                           | Exp28-013       | 1 mg                      | 18B-28013     | SM07_18B-28013_M07_octanol_pH-metric_high_logP_report.pdf |
| SM08 <sup>1</sup>  | M08                      |                           | 3.05 +- 0.01           | -0.40 +- 0.05             | EXP29-07        | 1 mg                      | 18C-02007     | SM08_18C-02007_M08_octanol_pH-metric_high_logP_report.pdf |
| SM08 <sup>1</sup>  | M08                      |                           | 3.08 +- 0.01           | -0.07 +- 0.05             | EXP29-08        | 1 mg                      | 18C-02008     | SM08_18C-02008_M08_octanol_pH-metric_high_logP_report.pdf |
| SM08 <sup>1</sup>  | M08                      |                           | 3.16 +- 0.01           | 0.23 +- 0.03              | EXP29-09        | 1 mg                      | 18C-02009     | SM08_18C-02009_M08_octanol_pH-metric_high_logP_report.pdf |
| SM09               | M09                      | -9.50 +- 0.85             | 2.90 +- 0.01           |                           | EXP29-10        | 1 mg                      | 18C-02010     | SM09_18C-02010_M09_octanol_pH-metric_high_logP_report.pdf |
| SM09               | M09                      | 1.05 +- 0.04              | 3.14 +- 0.01           |                           | EXP29-01        | 1 mg                      | 18C-03001     | SM09_18C-03001_M09_octanol_pH-metric_high_logP_report.pdf |
| SM09               | M09                      | 0.91 +- 0.07              | 3.05 +- 0.02           |                           | EXP30-07        | 1 mg                      | 18C-06007     | SM09_18C-06007_M09_octanol_pH-metric_high_logP_report.pdf |
| SM11               | M11                      | -5.60 +- 1.55             | 2.09 +- 0.01           |                           | EXP27-16        | 1 mg                      | 18B-27016     | SM11_18B-27016_M11_octanol_pH-metric_high_logP_report.pdf |
| SM11               | M11                      | 0.55 +- 0.07              | 2.19 +- 0.02           |                           | Exp28-01        | 1.1 mg                    | 18C-01001     | SM11_18C-01001_M11_octanol_pH-metric_high_logP_report.pdf |
| SM11               | M11                      | -3.66 +- 2.11             | 2.01 +- 0.02           |                           | Exp28-02        | 1.1 mg                    | 18C-01002     | SM11_18C-01002_M11_octanol_pH-metric_high_logP_report.pdf |
| SM11               | M11                      | -0.33 +- 0.82             | 2.12 +- 0.01           |                           | EXP31-10        | 1.5 mg                    | 18C-09010     | SM11_18C-09010_M11_octanol_pH-metric_high_logP_report.pdf |
| SM12               | M12                      | 1.02 +- 0.07              | 3.79 +- 0.02           |                           | EXP28-12        | 1.5 mg                    | 18C-01012     | SM12_18C-01012_M12_octanol_pH-metric_high_logP_report.pdf |
| SM12               | M12                      | -4.20 +- 1.91             | 3.81 +- 0.01           |                           | EXP29-13        | 2 mg                      | 18C-03013     | SM12_18C-03013_M12_octanol_pH-metric_high_logP_report.pdf |
| SM12               | M12                      | 0.62 +- 0.05              | 3.91 +- 0.01           |                           | EXP29-14        | 2 mg                      | 18C-03014     | SM12_18C-03014_M12_octanol_pH-metric_high_logP_report.pdf |
| SM12               | M12                      | 0.40 +- 0.06              | 3.80 +- 0.01           |                           | EXP29-15        | 2 mg                      | 18C-03015     | SM12_18C-03015_M12_octanol_pH-metric_high_logP_report.pdf |
| SM13 <sup>2</sup>  | M13                      | -4.95 +- 1.76             | 2.87 +- 0.01           |                           | EXP31-11        | 1.5 mg                    | 18C-09011     | SM13_18C-09011_M13_octanol_pH-metric_high_logP_report.pdf |
| SM13 <sup>2</sup>  | M13                      | -7.57 +- 1.49             | 2.89 +- 0.02           |                           | EXP32-16        | 1.5 mg                    | 18C-16016     | SM13_18C-16016_M13_octanol_pH-metric_high_logP_report.pdf |
| SM13 <sup>3</sup>  | M13                      | 0.09 +- 0.08              | 2.99 +- 0.03           |                           | EXP34-10        | 1 mg                      | 18C-26010     | SM13_18C-26010_M13_octanol_pH-metric_high_logP_report.pdf |
| SM14               | M15                      | -4.96 +- 2.15             | 1.92 +- 0.01           |                           | EXP27-02        | 2 mg                      | 18B-28002     | SM14_18B-28002_M15_octanol_pH-metric_high_logP_report.pdf |
| SM14               | M15                      | -0.11 +- 0.20             | 1.92 +- 0.01           |                           | Exp28-04        | 2 mg                      | 18C-01004     | SM14_18C-01004_M15_octanol_pH-metric_high_logP_report.pdf |
| SM14               | M15                      | -0.05 +- 0.07             | 1.93 +- 0.01           |                           | EXP28-05        | 2 mg                      | 18C-01005     | SM14_18C-01005_M15_octanol_pH-metric_high_logP_report.pdf |
| SM14               | M15                      | 0.28 +- 0.16              | 2.04 +- 0.02           |                           | EXP29-06        | 2 mg                      | 18C-03006     | SM14_18C-03006_M15_octanol_pH-metric_high_logP_report.pdf |
| SM15               | M16                      | 1.38 +- 1.07              | 3.14 +- 0.01           |                           | EXP28-07        | 1.5 mg                    | 18C-01007     | SM15_18C-01007_M16_octanol_pH-metric_high_logP_report.pdf |
| SM15               | M16                      | -1.34                     | 3.04                   |                           | EXP28-08        | 1.5 mg                    | 18C-01008     | SM15_18C-01008_M16_octanol_pH-metric_high_logP_report.pdf |
| SM15               | M16                      | -0.17 +- 0.20             | 3.04 +- 0.01           |                           | EXP28-09        | 1.5 mg                    | 18C-01009     | SM15_18C-01009_M16_octanol_pH-metric_high_logP_report.pdf |
| SM16 <sup>2</sup>  | M18                      | -0.24 +- 0.09             | 2.63 +- 0.01           |                           | EXP31-14        | 1.5 mg                    | 18C-09014     | SM16_18C-09014_M18_octanol_pH-metric_high_logP_report.pdf |
| SM16 <sup>2</sup>  | M18                      | -0.73 +- 0.56             | 2.59 +- 0.01           |                           | EXP31-15        | 1.5 mg                    | 18C-09015     | SM16_18C-09015_M18_octanol_pH-metric_high_logP_report.pdf |
| SM16 <sup>2</sup>  | M18                      | -0.21 +- 0.12             | 2.63 +- 0.02           |                           | EXP31-16        | 1.5 mg                    | 18C-09016     | SM16_18C-09016_M18_octanol_pH-metric_high_logP_report.pdf |

<sup>1</sup> Sample predosed with 80 uL octanol to help with kinetic solubility issues.

<sup>2</sup> Sample predosed with 100 uL octanol to help with kinetic solubility issues.

<sup>3</sup> Sample predosed with 200 uL octanol to help with kinetic solubility issues.

**Table S3. SMILES and InChI identifiers of SAMPL6 log P Challenge molecules.**

| SAMPL6 Molecule ID | isomeric SMILES                                        | InChI                                                                                                                   |
|--------------------|--------------------------------------------------------|-------------------------------------------------------------------------------------------------------------------------|
| SM02               | <chem>c1ccc2c(c1)c(ncn2)Nc3cccc(c3)C(F)(F)F</chem>     | InChI=1S/C15H10F3N3/c16-15(17,18)10-4-3-5-11(8-10)21-14-12-6-1-2-7-13(12)19-9-20-14/h1-9H,(H,19,20,21)                  |
| SM04               | <chem>c1ccc2c(c1)c(ncn2)Nc3ccc(cc3)Cl</chem>           | InChI=1S/C15H12ClN3/c16-12-7-5-11(6-8-12)9-17-15-13-3-1-2-4-14(13)18-10-19-15/h1-8,10H,9H2,(H,17,18,19)                 |
| SM07               | <chem>c1ccc(cc1)CNc2c3cccc3ncn2</chem>                 | InChI=1S/C15H13N3/c1-2-6-12(7-3-1)10-16-15-13-8-4-5-9-14(13)17-11-18-15/h1-9,11H,10H2,(H,16,17,18)                      |
| SM08               | <chem>Cc1ccc2c(c1)c(c(=O)[nH]2)CC(=O)O)c3ccccc3</chem> | InChI=1S/C18H15NO3/c1-11-7-8-15-13(9-11)17(12-5-3-2-4-6-12)14(10-16(20)21)18(22)19-15/h2-9H,10H2,1H3,(H,19,22)(H,20,21) |
| SM09               | <chem>COc1cccc(c1)Nc2c3cccc3ncn2.Cl</chem>             | InChI=1S/C15H13N3O.ClH/c1-19-12-6-4-5-11(9-12)18-15-13-7-2-3-8-14(13)16-10-17-15;/h2-10H,1H3,(H,16,17,18);1H            |
| SM11               | <chem>c1ccc(cc1)n2c3c(nc2)c(ncn3)N</chem>              | InChI=1S/C11H9N5/c12-10-9-6-15-16(11(9)14-7-13-10)8-4-2-1-3-5-8/h1-7H,(H2,12,13,14)                                     |
| SM12               | <chem>c1ccc2c(c1)c(ncn2)Nc3cccc(c3)Cl.Cl</chem>        | InChI=1S/C14H10ClN3.ClH/c15-10-4-3-5-11(8-10)18-14-12-6-1-2-7-13(12)16-9-17-14;/h1-9H,(H,16,17,18);1H                   |
| SM13               | <chem>Cc1cccc(c1)Nc2c3cc(c(cc3ncn2)OC)OC</chem>        | InChI=1S/C17H17N3O2/c1-11-5-4-6-12(7-11)20-17-13-8-15(21-2)16(22-3)9-14(13)18-10-19-17/h4-10H,1-3H3,(H,18,19,20)        |
| SM14               | <chem>c1ccc(cc1)n2cnc3c2ccc(c3)N</chem>                | InChI=1S/C13H11N3/c14-10-6-7-13-12(8-10)15-9-16(13)11-4-2-1-3-5-11/h1-9H,14H2                                           |
| SM15               | <chem>c1ccc2c(c1)ncn2c3ccc(cc3)O</chem>                | InChI=1S/C13H10N2O/c16-11-7-5-10(6-8-11)15-9-14-12-3-1-2-4-13(12)15/h1-9,16H                                            |
| SM16               | <chem>c1cc(c(c1)Cl)C(=O)Nc2ccncc2)Cl</chem>            | InChI=1S/C12H8Cl2N2O/c13-9-2-1-3-10(14)11(9)12(17)16-8-4-6-15-7-5-8/h1-7H,(H,15,16,17)                                  |

**Table S4. Molecules from SAMPL6 pK<sub>a</sub> Challenge not included in SAMPL6 log P Challenge.** These are molecules for which potentiometric log P experiments could not be optimized. Suspected reasons why good log P measurements could not be collected for these molecules are listed in the "Limitation for potentiometric log P" column. Limitation of pK<sub>a</sub> value indicates that apparent pK<sub>a</sub> shifts outside of measurable range in the presence of the octanol phase. Solubility limitation indicates that we could not find a potentiometric log P protocol that can avoid precipitation issues. Experimental pK<sub>a</sub> values were originally reported elsewhere [29].

| SAMPL6 Molecule ID | Limitation for potentiometric log P | Experimental pK <sub>a</sub>           | SMILES                                                                 | Experimental Molecule ID |
|--------------------|-------------------------------------|----------------------------------------|------------------------------------------------------------------------|--------------------------|
| SM01               | pK <sub>a</sub>                     | 9.53 (acid)                            | <chem>c1cc2c(cc1O)c3c(o2)C(=O)NCCC3</chem>                             | M01                      |
| SM03               | solubility                          | 7.02 (acid)                            | <chem>c1ccc(cc1)C2nnc(s2)NC(=O)c3ccccc3</chem>                         | M03                      |
| SM05               | solubility                          | 4.59 (base)                            | <chem>c1ccc(c(c1)NC(=O)c2ccc(o2)Cl)N3CCCC3</chem>                      | M05                      |
| SM06               | solubility                          | 3.03 (base), 11.74 (base)              | <chem>c1cc2cccnc2c(c1)NC(=O)c3cc(cnc3)Br</chem>                        | M06                      |
| SM10               | solubility                          | 9.02 (base)                            | <chem>c1ccc(cc1)C(=O)NCC(=O)Nc2nc3ccccc3s2</chem>                      | M10                      |
| SM17               | pK <sub>a</sub> and solubility      | 3.16 (base)                            | <chem>c1ccc(cc1)CSc2nnc(o2)c3ccncc3</chem>                             | M19                      |
| SM18               | pK <sub>a</sub> and solubility      | 2.15 (base), 9.58 (acid), 11.02 (acid) | <chem>c1ccc2c(c1)c(=O)[nH]c(n2)CCC(=O)Nc3ncc(s3)Cc4ccc(c(c4)F)F</chem> | D01                      |
| SM19               | pK <sub>a</sub> and solubility      | 9.56 (acid)                            | <chem>CCOc1ccc2c(c1)sc(n2)NC(=O)Cc3ccc(c(c3)Cl)Cl</chem>               | D02                      |
| SM20               | solubility                          | 5.70 (base)                            | <chem>c1cc(cc(c1)OCc2ccc(cc2Cl)Cl)/C=C/3\1C(=O)NC(=O)S3</chem>         | D05                      |
| SM21               | solubility                          | 4.10 (base)                            | <chem>c1cc(cc(c1)Br)Nc2c(cnc(n2)Nc3cccc(c3)Br)F</chem>                 | D06                      |
| SM22               | solubility                          | 2.40 (base), 7.43 (acid)               | <chem>c1cc2c(cc(c(c2nc1)O))I</chem>                                    | D07                      |
| SM23               | solubility                          | 5.45 (base)                            | <chem>CCOC(=O)c1ccc(cc1)Nc2cc(nc(n2)Nc3ccc(cc3)C(=O)OCC)C</chem>       | D08                      |
| SM24               | pK <sub>a</sub>                     | 2.60 (base)                            | <chem>COc1ccc(cc1)c2c3c(ncnc3oc2c4ccc(cc4)OC)NCCO</chem>               | D09                      |

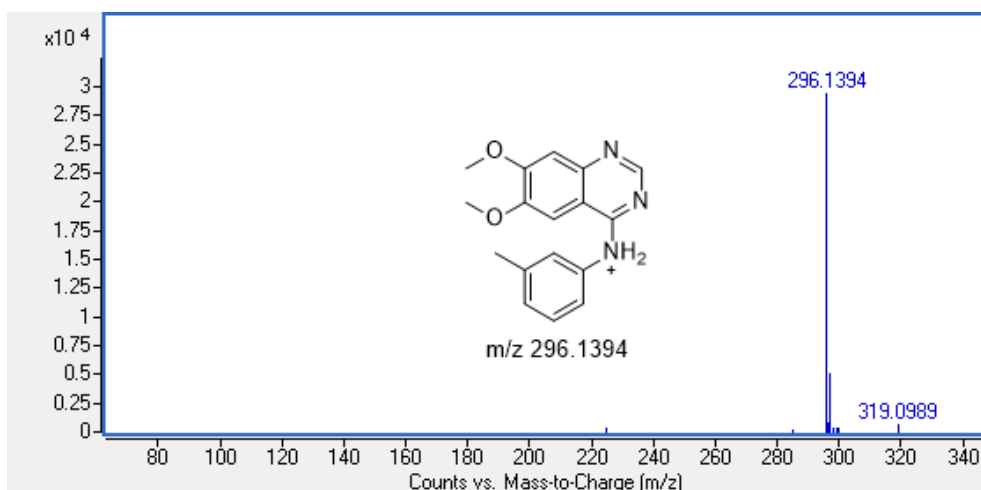

Figure S1. HRMS determination of SM13 molecular weight confirmed the supplier reported molecular weight.

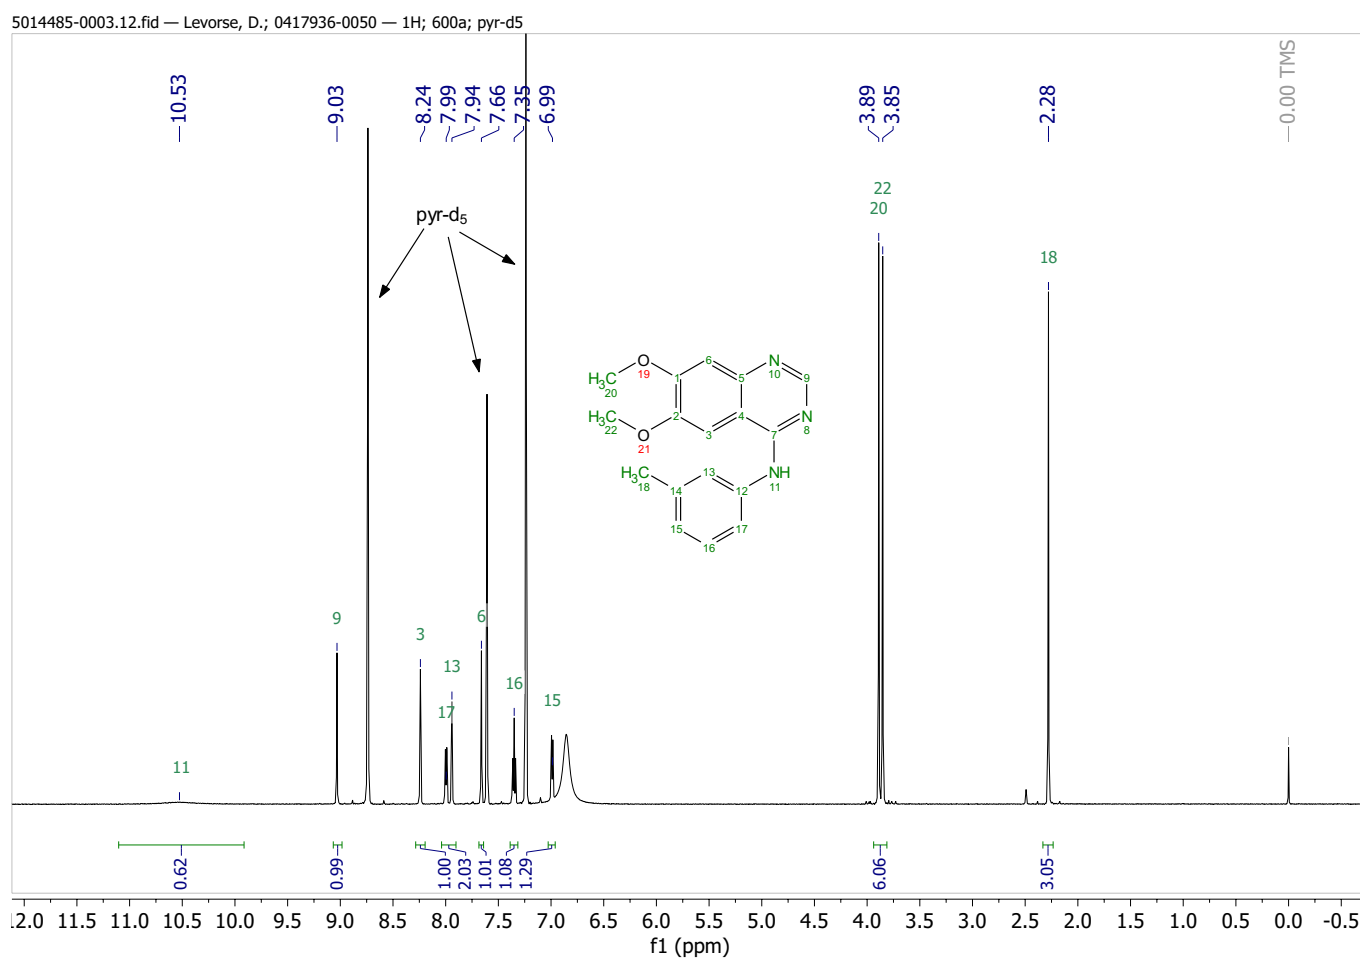

Figure S2. The  $^1\text{H}$  1D NMR spectrum of SM13 confirms compound identity and structure.
